# Supplementary material for: Prevalence of diabetes in Brazil over time: a systematic review with meta-analysis
Source: PubMed Central journal article supplement (PMC5015260; doi:10.1186/s13098-016-0181-1), 2016-09-07
Supplement: 13098_2016_181_MOESM2_ESM.pdf [file 13098_2016_181_MOESM2_ESM.pdf]

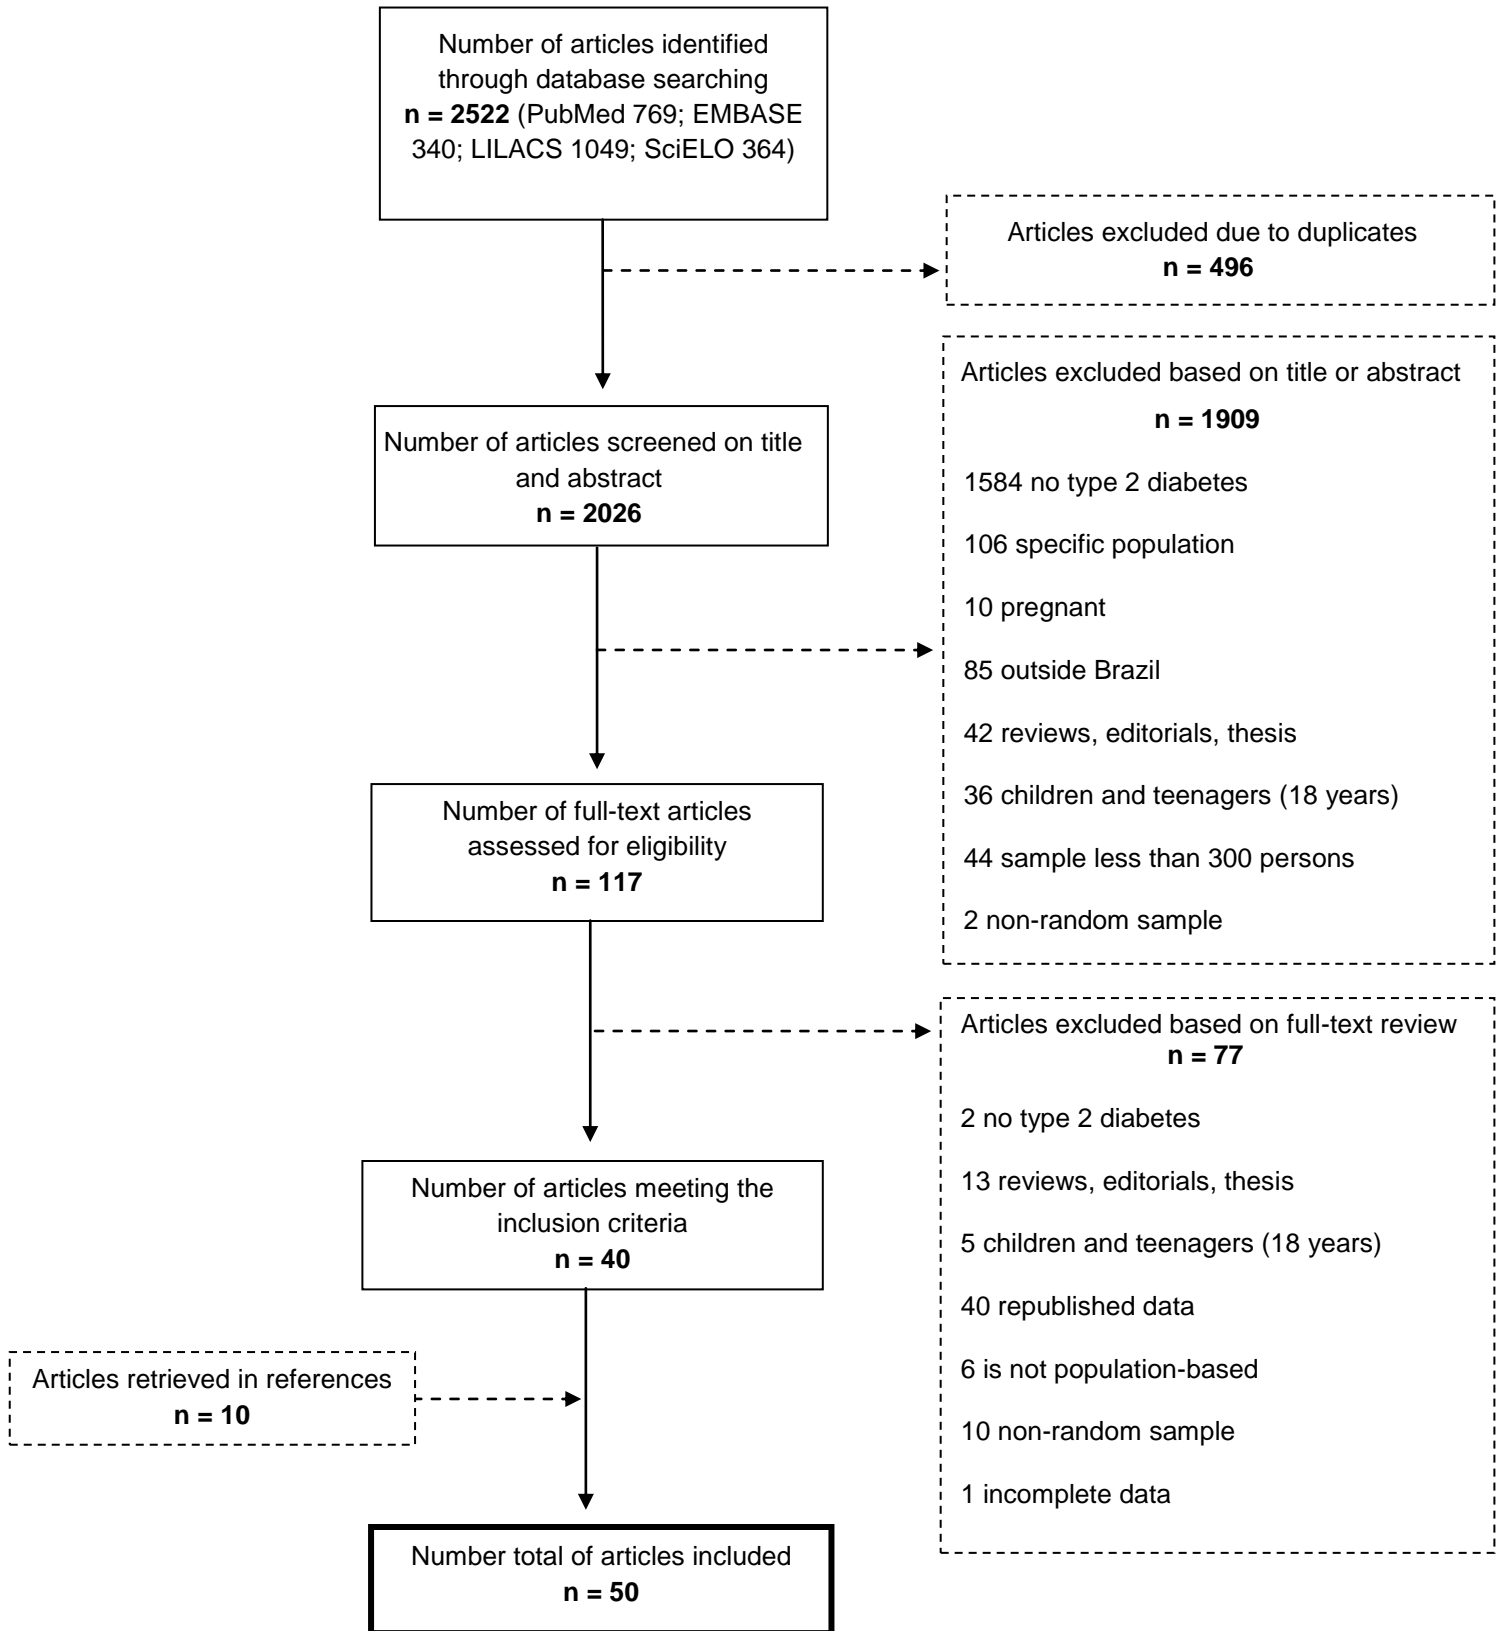

**Figure S1.** Flow diagram: identification and selection of articles included in the meta-analysis
