# Supplementary material for: Prevalence of diabetes in Brazil over time: a systematic review with meta-analysis
Source: PubMed Central journal article supplement (PMC5015260; doi:10.1186/s13098-016-0181-1), 2016-09-07
Supplement: 13098_2016_181_MOESM4_ESM.pdf [file 13098_2016_181_MOESM4_ESM.pdf]

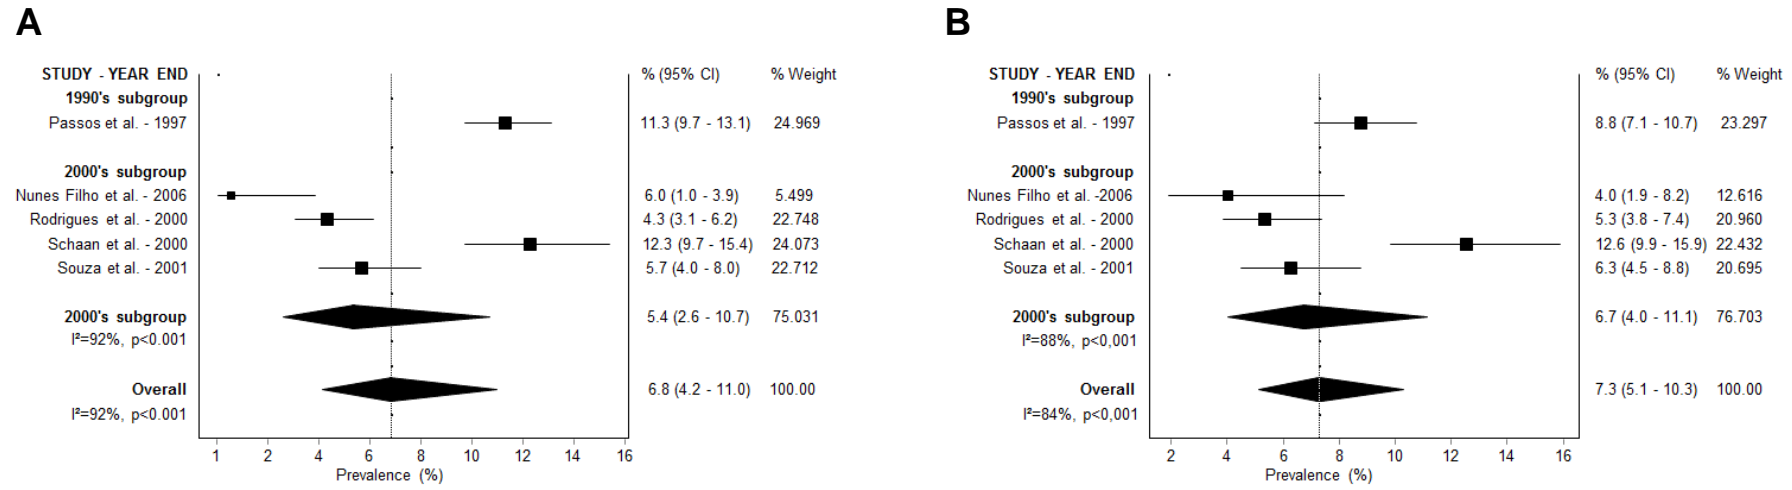

**Figure S3.** Forest plot representing diabetes prevalence rates by fasting glucose diagnosis and decades in (A) women and (B) men
